# Supplementary material for: Influence of Amino Acids on the Mobility of Iodide in Hydrocalumite
Source: MDPI journal article supplement (doi:10.3390/min11080836), 2021-08-01
Supplement: s1 [file s1]

Archive with 1 entries (1 files):
- minerals-1278825-supplementary.pdf
