# Supplementary figures and images for: Influence of Amino Acids on the Mobility of Iodide in Hydrocalumite
Source: MDPI journal article supplement (doi:10.3390/min11080836), 2021-08-01

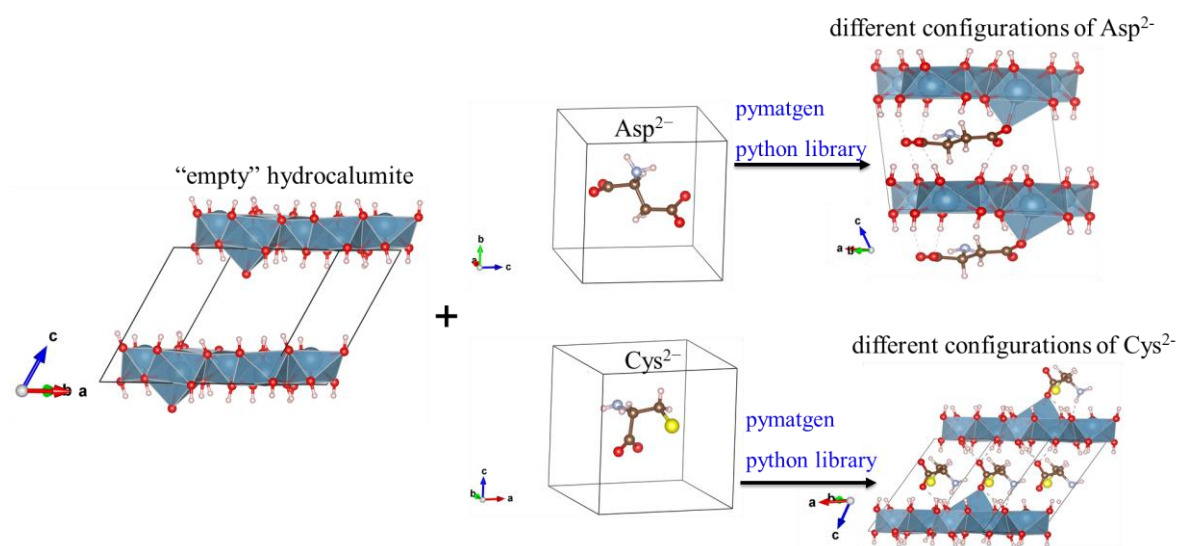

**Figure S1.** Construction of amino acids-hydrocalumite model in DFT simulation

Supplement: s1 [file s1 › minerals-1278825-supplementary.pdf]
